# Supplementary material
Source: MDPI journal article supplement (https://www.mdpi.com/1999-4907/6/9/3304)
Supplement: s1 [file s1]

Supplementary Materials


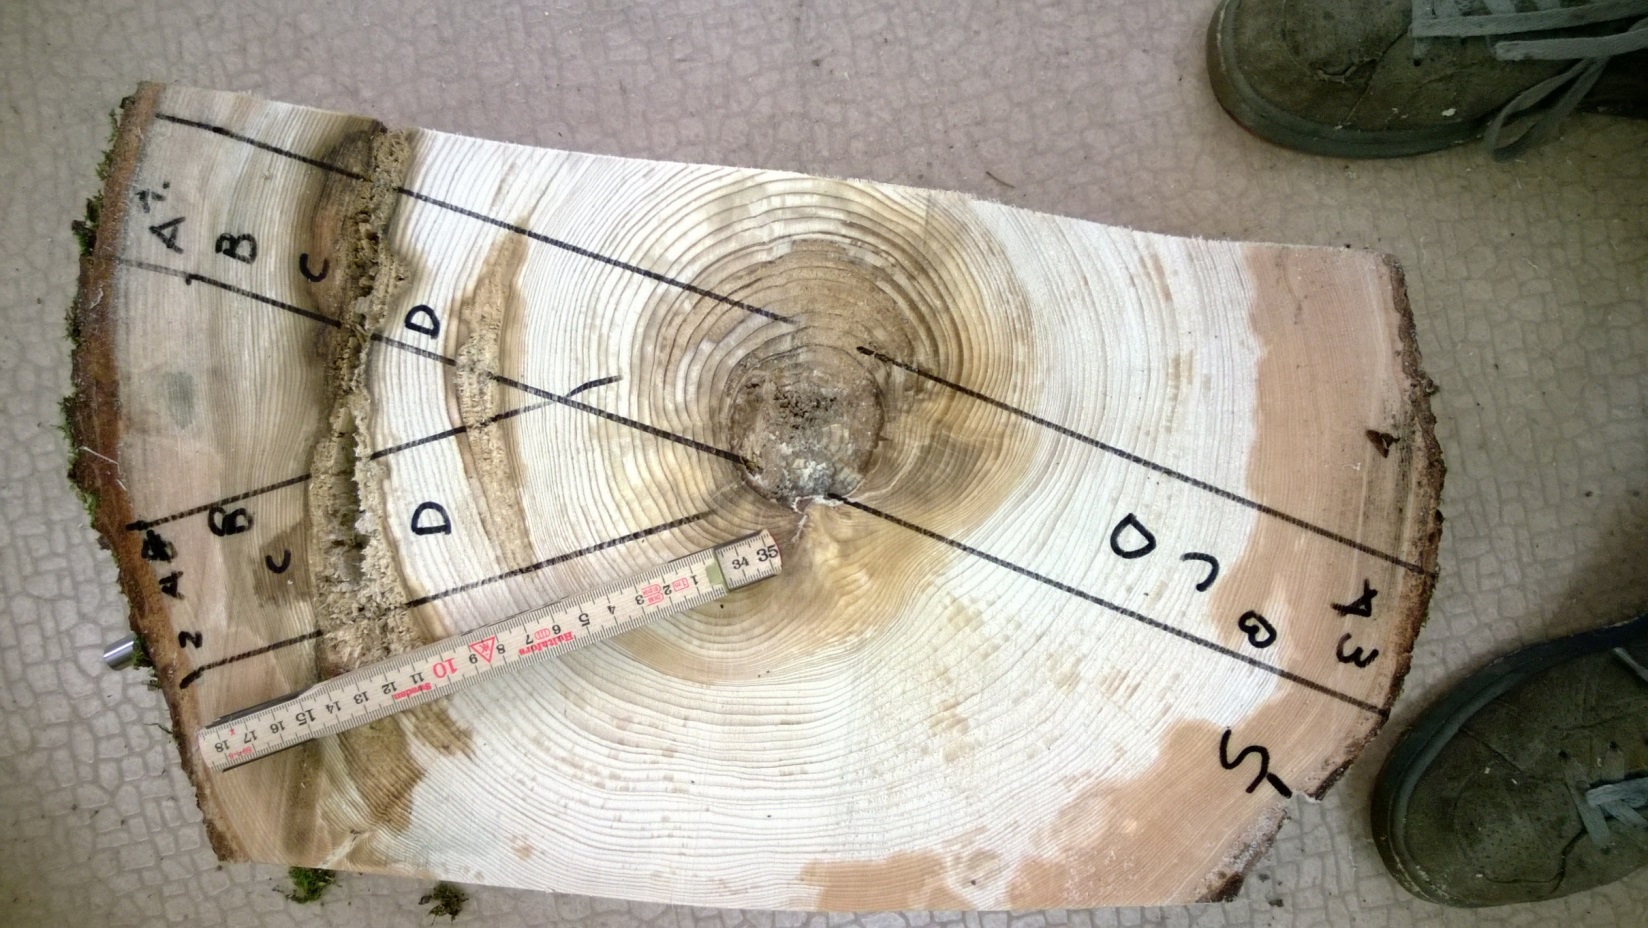


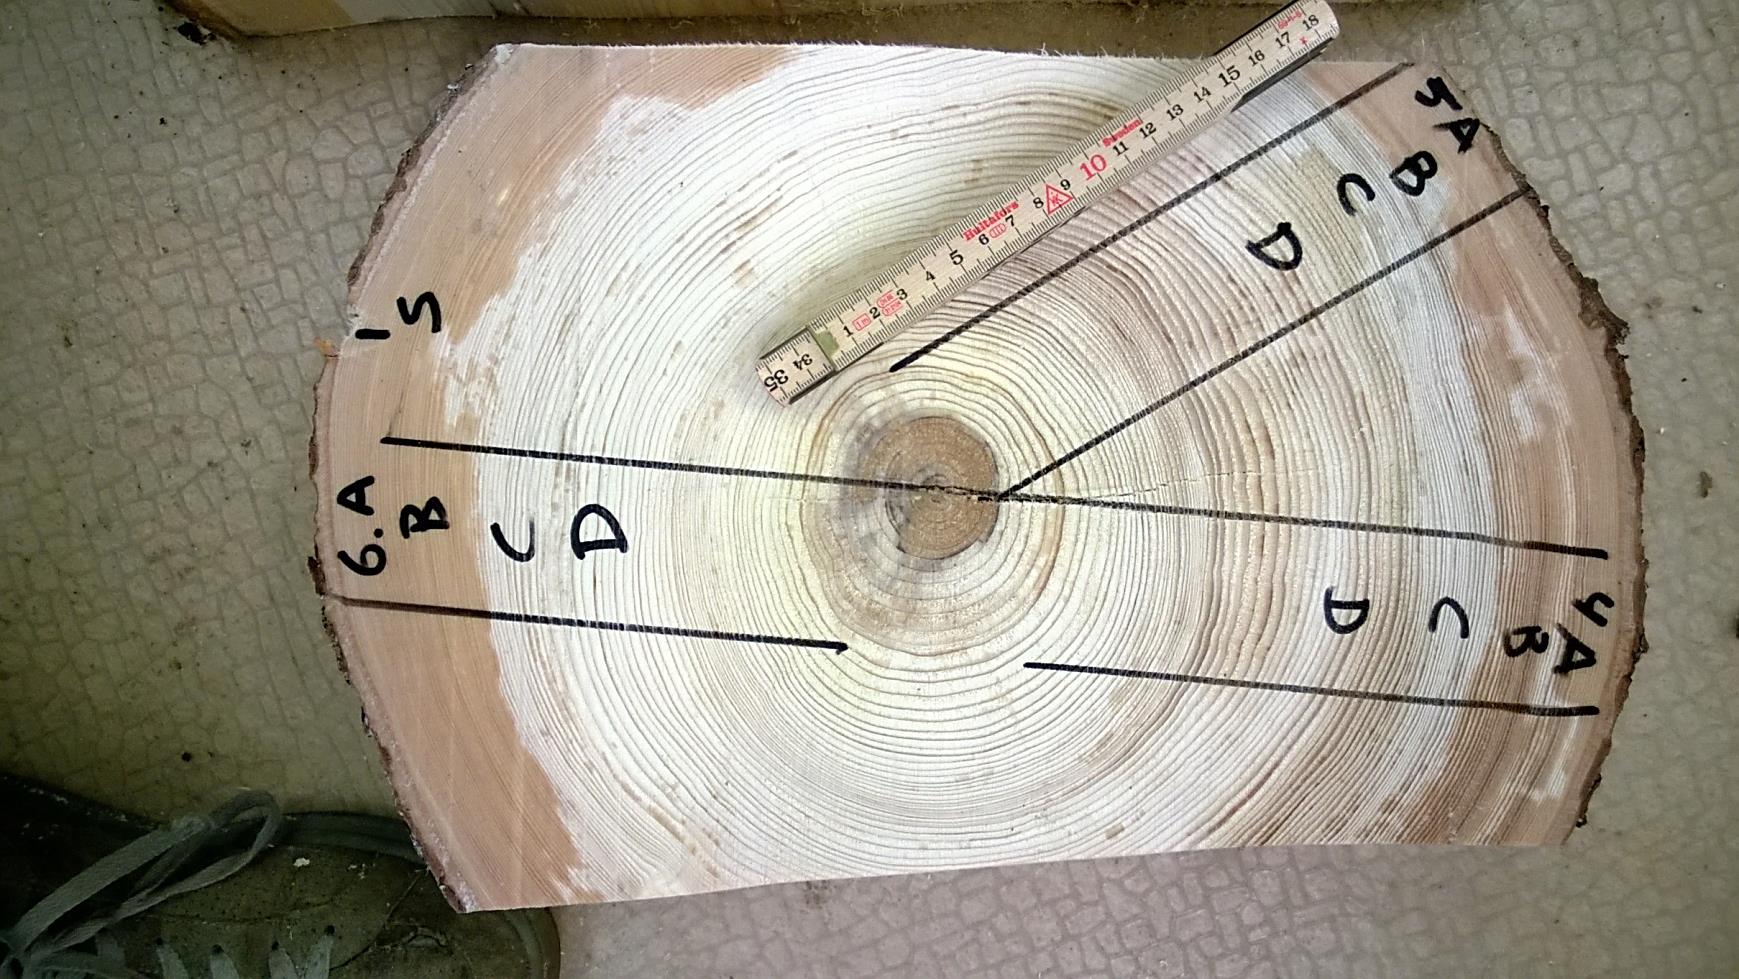


**Figure S1.** Norway spruce tree #6: stem discs from stump level (**top**) and breast height (**bottom**). At both heights subsamples (positions marked with letters A–D) were taken from defined tissues along three radii (1–3 and 4–6) in order to monitor CO2 and CH4 production rates under anoxic and hypoxic laboratory conditions. Radii 2 and 5 correspond to the sampling positions used for recording *in situ* stem concentrations of CO2 and CH4 in
this tree.

Calculations of Area of the Infected Part of the Tree

Eide and Langsæter (1927) developed the taper tables that are still in use in Norway. The tables were constructed by use of Behre’s stem curve

|  | (1) |
| --- | --- |

where d and D are diameters at an upper and lower point of the stem, L is the ratio between the length from the top to d and the length from the top to D, whereas a and b are coefficients. Eide and Langsæter constructed their tables based on diameter measurements at breast height and relative heights of 0.4 and 0.8 from the tree top of *ca.* 3000 trees from Norway spruce forests in Norway. Summary tables of their data from various diameter classes can be found in their report.

From these data it is straight forward to construct a general method to estimate thecoefficients a and b from the height to diameter ratio of the trees. Eide and Langsæter explained how to calculate the diameter at breast height from the data.

To obtain a and b from the data and Behre’s formula first one needs to calculate the

| L1 = ()/(h_meter-1.3) |  |
| --- | --- |
| L1 = |  |

which is the ratio of the length from the top to h_08 which is the height 0.8 from the tree top to the length from the tree top to breast height

| L2 = |  |
| --- | --- |

is the corresponding value for the length to h_04 i.e 0.4 from the tree top.

| r1 = |  |
| --- | --- |

is the ratio of the diameters at h_08 to d_13 ie, at breast height

| r2 = |  |
| --- | --- |

and r2 is the corresponding ratio for the diameter at h_04 to d_13.

Now rearranging Behre’s formula one gets

| b = |  |
| --- | --- |

and

| a = -bL1 |  |
| --- | --- |

From Eide and Langsæter’s tables one can derive D13, a and b as well as the height diameter ratio of the trees.

**Figure S2.** Plot of the parameter b in Behre’s stem curve formula versus height diameter ratio. Data were derived from Tables 3–5 in Eide and Langsæter 1927.

With the data in Figure 1, b was estimated to be a liner function of h_d ratio:

| b = 0.03224 + 0.3820 * h_d ratio |  |
| --- | --- |

a is then determined by the formula a = L1/R1 − b*L1 as explained above.

When d is determined, the taper of the stem is:

| t = (d2 − d1)/(h2 − h1) |  |
| --- | --- |

where d2 and d1 are diameters at heights h2 and h1, respectively, all values in meters.

The surface area is then calculated as

| A = π (d2 + t * (l2 − l1)) |  |
| --- | --- |

This formula underestimates the area in the lower part of the stem because it is does not account for the (often large) expansion of the stem base. We use it here for two reasons 1; after multiplication with the flux function one gets a function that is easy to integrate, 2; there are no well-tested functions for the taper of Norway spruce stems near the root.

Below is given another way to find the surface area or volume by using Behre’s stem curve:

When a and b, tree height and diameter at breast height are known, Behre’s formula can be rearranged to correspond to the surface area or the volume of a tree.

For the area we write:

| A = |  |
| --- | --- |

and integrate

| *∫f(x)****d****x* = *D13*π⋅(*Lb* − *a*⋅ln(*bL* + *a*)*b^*2) |  |
| --- | --- |

The integrals are readily found by tools available on the internet such as http://www.wolframa
lpha.com/ or http://www.integral-calculator.com/.

For volume, first convert the formula to basal area at height corresponding to d:

| G = π0.5d^2 |  |
| --- | --- |
| G = 1/4π |  |

The integral between two heights gives the volume thus:

| V = H* π /4*(D13)**2 * (((−2*a*log(b*L + a))/b**3 − (a**2/(b**4*L + a*b**3)) + L/b**2) |  |
| --- | --- |

where H is the height of the tree

The volumes calculated in this way deviate little from the volume functions that are in common use in Norwegian forestry.

References

Eide, E.; Langsæter, A. Table of taper for Norway spruce forests. *Medd. Nor. Skogforsøksves.* **1929**, *3*, 345–374.

Estimating CO2 Emission from Wood Density Data

**Figure S3.** CO2 loss calculated from decline in wood density in a rotten stem of Norway spruce. The age estimate assumes a fungal vertical spread of 18.5 cm per year, age
40 corresponding to ground level and age 0 to a height of seven meters.

To estimate stem surface area and volume of the stem sections corresponding to one year of fungal vertical spread (18.5 cm), we plotted the stem diameter at various heights and fitted an hyperbolic function to predict the diameters (Figure S3).

**Figure S4.** Relationship between stem diameters and height from the ground in the tree which was used for density based flux estimation.

The derivative of the predicted density loss in kg CO2 per cubic meter gives the annual loss per cubic meter of the stem section. This was multiplied by the volume of the stem section and divided by its area to give annual CO2 loss per square meter. The calculations are given in the rightmost table of the excel spreadsheet with supplementary data. Thereafter these predicted values for annual loss were plotted against the distance from fresh wood, *i.e.*, the distance from the top of the rot column and an exponential growth model was fitted to the data as shown in Figure S4.

**Figure S5.** Annual CO2 flux estimated from reduction in wood density in decaying stem sections of one tree. An annual vertical spread of 18.5 cm is used for the calculations.

The parameters shown in Figure S4 were used in calculation of wood density based fluxes in the
up-scaling exercise, where the product of the tree surface area and the flux per square meter was integrated from the upper end (left in Figure 4) towards the ground level (right in Figure 4). It should be kept in mind here that both the annual CO2 flux and the surface area increase considerably towards the ground level.

© 2015 by the authors; licensee MDPI, Basel, Switzerland. This article is an open access article distributed under the terms and conditions of the Creative Commons Attribution license (http://creativecommons.org/licenses/by/4.0/).
