# Supplementary material
Source: MDPI journal article supplement (https://www.mdpi.com/1999-4907/6/9/3304)
Supplement: s2 [file s2]

## Sheet: Tables 1-3
Supplementary file 2.
Table 1. Norway spruce data from national forest inventories used in up scaling of carbon loss due to decay																																Table 2. Estimated diffusion coefficients (D) for the sampled trees from different sites (µmol s-1 m2)										Table 3. Calculations of annual CO2 emission based on wood density measurments in one tree
References:	County	hkl	bon	S_PROV_TRE	w_d1_cm	w_v1_m3	w_iv_m3	w_hl_m	w_n1	w_tt	w_t13_est_year	w_g1_m2	w_rot_percent	estimated_rot_length	gross_i_co2_ha_year	co2_loss_rot_tonn_ha_year	net_gross_ratio_flux_based_Hokksund	net_gross_ratio_flux_based_Ås	net_gross_ratio_density_based			Variable name explanation										Site	Decay fungus	D	n	std	min	max				Distance from the ground	Distance from healthy wood	years from infection if annual spred is 18.5 cm	pam: a	parm: b	b_rescaled to 18.5 cm vspread	CO2 lost_kg_m-2	CO2_lost_annually_kg_m3
Tomter S.M. Statistikk over skogforhold og –ressurser i Akershus og Oslo. Landsskogtakseringen 1995 – 99. NIJOS-ressursoversikt: 4/01. 2001, pp. 1-56.																																Hokksund	Armillaria sp.	1.057e-06	32	1.444e-06	1.6e-08	5.206e-06				0	7	40	5.0675	0.4519	0.0790825	119.839	9.47715
Table 70. Summary for cutting class III	Akershus	III	1	227	13.6841	153.947	11.3308	13.5802	1588.01	40.63	35.3656	23.1988	5.30973	1.35146	8.89924	0.00608564	0.999316	0.997729	0.999877			hkl	cutting class									Ås	Armillaria sp.	3.444e-06	122	5.261e-06	4e-09	3.7368e-05				0.175	6.825	39	5.0675	0.4519	0.0790825	110.727	8.75655
Table 71. Summary for cutting class IV	Akershus	III	2	173	12.1197	99.5318	6.33353	11.452	1461.77	46.1272	43.0289	16.967	3.48837	0.887878	4.97435	0.00154608	0.999689	0.998892	0.999934			bon	Site index weighted by plot number									Hokksund	Healthy	2.097e-06	32	6.187e-06	2.3e-08	3.526e-05				0.35	6.65	38	5.0675	0.4519	0.0790825	102.307	8.09073
Table 72. Summary for cutting class V	Akershus	III	3	6	10.8	59	2.9	8.9	1370	55	57	12.5504	0	0	2.27766	0	1	1	1			s_prov_tre	sum of sample trees in that stratum									Ås	Healthy	1.181e-06	38	1.303e-06	2.5e-08	4.645e-06				0.525	6.475	37	5.0675	0.4519	0.0790825	94.5284	7.47554
Table 82. Volum percentage of decay in cutting classes III-V	Akershus	IV	1	223	20.6803	277.673	12.0525	19.2175	882.475	57.2063	48.13	29.4494	9.90991	2.52232	9.46601	0.0414594	0.99562	0.988155	0.999517			w_d1	Diameter at 1.3 meter weighte by the s_prov_tre									Hokksund	Heterobasidion annosum s.l.	1.08e-06	137	1.634e-06	7e-09	1.0034e-05				0.7	6.3	36	5.0675	0.4519	0.0790825	87.3408	6.90713
	Akershus	IV	2	141	19.3383	173.461	6.01348	15.9759	731.95	77.1206	63.4965	21.5719	14.2857	3.63607	4.72298	0.164261	0.965221	0.924181	0.997678			w_v1	Stand volum in m3 per hectare weighted by the s_prov_tre									Ås	Heterobasidion annosum s.l.	3.158e-05	81	6.3886e-05	2.36e-07	0.000468674				0.875	6.125	35	5.0675	0.4519	0.0790825	80.6997	6.38194
	Akershus	IV	3	18	17.2889	96	2.87778	12.6	606	94.1111	79.6667	14.2713	0	0	2.26021	0	1	1	1			w_d1	Stand volum in m3 per hectare weighted by the s_prov_tre									Hokksund	Phellinus chrysoloma	5.29e-07	33	5.77e-07	2.3e-08	2.253e-06				1.05	5.95	34	5.0675	0.4519	0.0790825	74.5636	5.89668
	Akershus	V	1	137	25.9423	355.044	9.41314	22.827	626.131	90.9489	68.3066	32.7789	10.2941	2.62011	7.39308	0.0426987	0.994225	0.984694	0.999395			w_iv	weighted annual increment in cubic meters per hectare									Haukeli	Phellinus chrysoloma	8.35e-07	31	9.36e-07	1.6e-08	3.774e-06				1.225	5.775	33	5.0675	0.4519	0.0790825	68.8941	5.44832
	Akershus	V	2	244	22.6377	242.082	5.1918	18.7869	685.508	115.607	85.6557	27.5491	10.6996	2.72331	4.07764	0.0479702	0.988236	0.969372	0.998815			w_hl	Basal area weighted mean height weighted by the sample trees in each stratum																			1.4	5.6	32	5.0675	0.4519	0.0790825	63.6556	5.03405
Tomter, S. Eriksen, R. Aalde, H. Statistikk over skogforhold og –ressurser i Aust-Agder. Landsskogtakseringen 1995 – 99. NIJOS-ressursoversikt 3/01. 2001, pp. 1-56.																						w_n1	weighted tree numbers per hectare																			1.575	5.425	31	5.0675	0.4519	0.0790825	58.8155	4.65128
Table 70. Summary for cutting class III	Austagder	III	1	74	13.3541	131.811	10.3541	12.6757	1492.49	37.5405	31.2432	21.1894	4.10959	1.04599	8.13207	0.00269278	0.999669	0.998848	0.999934			w_tt	Total age of weighted by the number of sample trees in each stratum																			1.75	5.25	30	5.0675	0.4519	0.0790825	54.3434	4.29761
Table 71. Summary for cutting class IV	Austagder	III	2	55	11.4636	87.7091	6.23091	10.2855	1555.35	42.7818	36.0182	16.0273	7.40741	1.88537	4.89376	0.0144995	0.997037	0.99093	0.999557			w_t13_est	estimated age at breast height																			1.925	5.075	29	5.0675	0.4519	0.0790825	50.2113	3.97084
Table 72. Summary for cutting class V	Austagder	III	3	0																		w_g1	Basal area weighted by the sample trees in each stratum																			2.1	4.9	28	5.0675	0.4519	0.0790825	46.3934	3.66891
Table 82. Volum percentage of decay in cutting classes III-V	Austagder	IV	1	22	21.5455	189.045	11.2364	17.2364	675.591	58.5455	40.8636	22.9758	0	0	8.82504	0	1	1	1			w_rot_percent	percent rotten volume weighted by the number of sample trees in each stratum																			2.275	4.725	27	5.0675	0.4519	0.0790825	42.8658	3.38994
	Austagder	IV	2	57	20.8228	147.351	5.06842	15.2228	589.842	82.6491	58.8246	20.2714	1.78571	0.454509	3.98074	0.000185853	0.999953	0.999825	0.999989			estimated_rot_length	estimated rot length in the trees assuming an infection rate of 0.3 percent per year and 18.5 cm vertical spread of decay per year																			2.45	4.55	26	5.0675	0.4519	0.0790825	39.6065	3.13218
	Austagder	IV	3	8	19.1	80.75	1.475	11.9125	488.75	95.75	75.375	13.6148	0	0	1.15847	0	1	1	1			gross_i_co2_ha_year	gross CO2 accumulation in stem wood, tons per year converted as w_iv*430 *0.51*44/12																			2.625	4.375	25	5.0675	0.4519	0.0790825	36.5949	2.89402
	Austagder	V	1	72	26.3028	328.222	7.71944	21.4028	621.861	97.6389	63.3611	33.7476	0	0	6.06285	0	1	1	1			co2_loss_rot_tonn_ha_year	estimated CO2 loss per hectare due to the rotting of stem wood, rotting in roots are not incluced																			2.8	4.2	24	5.0675	0.4519	0.0790825	33.8124	2.67397
	Austagder	V	2	146	24.5377	212.829	4.76438	18.163	540.205	109.267	74.8356	25.5617	5.51724	1.40428	3.74195	0.00406844	0.998913	0.996443	0.999813			net_gross_ratio_flux_based	ratio of net to gross CO2 accumulation in stem wood from the estimated annual fluxes in five rotten trees																			2.975	4.025	23	5.0675	0.4519	0.0790825	31.2414	2.47065
	Austagder	V	3	20	20.77	99.5	1.82	13.73	461.6	132.3	89.8	15.6564	5.26316	1.3396	1.42943	0.00257708	0.998197	0.994026	0.99968			net_gross_ratio_density_based	ratio of net to gross CO2 accumulation in stem wood from measured reduction in wood density of one rotten tree																			3.15	3.85	22	5.0675	0.4519	0.0790825	28.8659	2.28279
Eriksen, R. Tomter, S. Ludahl, A. Statistikk over skogforhold og -ressurser i Buskerud. Landsskogtakseringen 2000-2004. NIJOS ressursoversikt 6/06. 2006, pp. 1-52.																																										3.325	3.675	21	5.0675	0.4519	0.0790825	26.6711	2.10922
Table 68. Summary for cutting class III	Buskerud	III	1	94	13.4894	163.606	13.6436	13.916	1693.91	38	35.0532	24.1752	3.22581	0.821048	10.7157	0.00160437	0.99985	0.999463	0.999968																							3.5	3.5	20	5.0675	0.4519	0.0790825	24.6431	1.94884
Table 69. Summary for cutting class IV	Buskerud	III	2	58	12.1724	91	6.52414	11.1069	1409.21	49.2759	43.0345	16.4422	0	0	5.12406	0	1	1	1																							3.675	3.325	19	5.0675	0.4519	0.0790825	22.7693	1.80066
Table 70. Summary for cutting class V	Buskerud	III	3	8	10.7	48	1.9	8.9	1176	59	58	10.5746	0	0	1.49226	0	1	1	1																							3.85	3.15	18	5.0675	0.4519	0.0790825	21.038	1.66374
Table 79. Volum percentage of decay in cutting classes III-V	Buskerud	IV	1	112	20.4018	287.536	15.4429	19.0071	941.893	57.5	49.3929	30.845	9.00901	2.29302	12.1288	0.0302774	0.997504	0.992959	0.999697																							4.025	2.975	17	5.0675	0.4519	0.0790825	19.4384	1.53724
	Buskerud	IV	2	76	19.3	177.5	6.2	15.9	770.5	80.5	66.5	22.5093	5.33333	1.35747	4.86948	0.00415627	0.999146	0.99718	0.99985																							4.2	2.8	16	5.0675	0.4519	0.0790825	17.9604	1.42035
	Buskerud	IV	3	38	17.0105	86	1.56842	12.1211	557.842	95.5263	81.0526	12.7361	2.7027	0.687905	1.23184	0.000417536	0.999661	0.998764	0.999924																							4.375	2.625	15	5.0675	0.4519	0.0790825	16.5947	1.31235
	Buskerud	V	1	62	24.3323	363.548	9.4629	22.5726	703.048	97.7097	74.4516	32.1765	4.91803	1.25176	7.43216	0.00373169	0.999498	0.99832	0.999909																							4.55	2.45	14	5.0675	0.4519	0.0790825	15.3329	1.21257
	Buskerud	V	2	131	23.3214	250.137	5.81679	18.5481	671.725	114.626	82.6794	28.7768	10.7692	2.74104	4.56851	0.0497094	0.989119	0.97177	0.998913																							4.725	2.275	13	5.0675	0.4519	0.0790825	14.1671	1.12037
	Buskerud	V	3	125	19.4264	112.768	2.3504	13.26	586.112	136.24	89.168	17.295	9.67742	2.46314	1.846	0.0237717	0.987123	0.964694	0.998529																							4.9	2.1	12	5.0675	0.4519	0.0790825	13.0899	1.03518
Tomter, S. Eriksen, R. Aalde, H. Statistikk over skogforhold og -ressurser i Hedmark. Landsskogtakseringen 1995-99 . NIJOS-ressursoversikt: 05/01. 2001, pp. 1-56.																																										5.075	1.925	11	5.0675	0.4519	0.0790825	12.0946	0.956467
Table 70. Summary for cutting class III	Hedmark	III	1	126	12.4214	131.643	10.0643	12.45	1755.43	37.3571	31.6429	21.1533	1.6	0.40724	7.90449	0.000256299	0.999968	0.999877	0.999992																							5.25	1.75	10	5.0675	0.4519	0.0790825	11.1749	0.883741
Table 71. Summary for cutting class IV	Hedmark	III	2	131	11.5	96.3282	6.33206	10.5298	1698.71	47.5649	40.9924	17.6443	0.769231	0.195788	4.9732	3.09427e-05	0.999994	0.999976	0.999998																							5.425	1.575	9	5.0675	0.4519	0.0790825	10.3252	0.816545
Table 72. Summary for cutting class V	Hedmark	III	3	16	10.7375	52.625	2.65625	8.69375	1273.44	62.8125	56.875	11.5182	0	0	2.08622	0	1	1	1																							5.6	1.4	8	5.0675	0.4519	0.0790825	9.54013	0.754458
Table 82. Volum percentage of decay in cutting classes III-V	Hedmark	IV	1	88	19.3239	277.193	11.8852	18.2818	1029.85	57.6364	47.1932	30.0762	20.6897	5.26603	9.33466	1.99797	0.785962	0.669046	0.993673																							5.775	1.225	7	5.0675	0.4519	0.0790825	8.81474	0.697092
	Hedmark	IV	2	123	17.7764	161.317	5.42602	14.6732	861.138	80.7967	61.561	21.3778	6.55738	1.66902	4.26159	0.00812467	0.998094	0.993998	0.999699																							5.95	1.05	6	5.0675	0.4519	0.0790825	8.1445	0.644087
	Hedmark	IV	3	40	16.8775	78.575	1.925	11.9025	534.375	97.275	74.7	11.9937	2.5641	0.652628	1.51189	0.000347177	0.99977	0.999159	0.999948																							6.125	0.875	5	5.0675	0.4519	0.0790825	7.52522	0.595113
	Hedmark	V	1	40	23.5675	357.675	7.9775	21.985	763.5	96.125	71.35	33.3883	7.69231	1.95788	6.26553	0.016015	0.997444	0.992366	0.999646																							6.3	0.7	4	5.0675	0.4519	0.0790825	6.95303	0.549863
	Hedmark	V	2	189	21.7857	262.651	5.28095	18.2762	786.032	116.556	82.0159	29.4413	6.91489	1.76001	4.14766	0.0107021	0.99742	0.992021	0.999612																							6.475	0.525	3	5.0675	0.4519	0.0790825	6.42435	0.508053
	Hedmark	V	3	102	20.1765	109.353	1.80196	13.3059	522.98	137.118	86.8824	16.7662	13.8614	3.52807	1.41526	0.105675	0.925331	0.83344	0.994729																							6.65	0.35	2	5.0675	0.4519	0.0790825	5.93586	0.469423
Eriksen, R. Tomter, S. Ludahl, A. Statistikk over skogforhold og -ressurser i Oppland. Landsskogtakseringen 2000-2004. NIJOS ressursoversikt 04/06, pp. 1-52.																																										6.825	0.175	1	5.0675	0.4519	0.0790825	5.48452	0.43373
Table 68. Summary for cutting class III	Oppland	III	1	144	14.1861	155.806	12.35	13.6278	1539.22	39.5556	35.7222	24.194	12.5874	3.20381	9.69969	0.139534	0.985615	0.965677	0.998806
Table 69. Summary for cutting class IV	Oppland	III	2	171	12.314	91.6491	6.30351	11.1211	1389.67	48.3158	42.7018	16.6364	4.11765	1.04804	4.95078	0.0023415	0.999527	0.998352	0.999904
Table 70. Summary for cutting class V	Oppland	III	3	20	11.55	49.8	2.24	9.315	978.85	63.35	60.2	10.2845	0	0	1.7593	0	1	1	1
Table 79. Volum percentage of decay in cutting classes III-V	Oppland	IV	1	253	20.1957	309.85	14.2688	18.8933	1027.84	59.4862	50.0316	32.7711	5.55556	1.41403	11.2067	0.0065285	0.999417	0.998095	0.9999
	Oppland	IV	2	253	19.3953	198.411	6.97826	15.6229	859.091	80.17	62.7233	25.4904	17.0635	4.34308	5.48073	0.504625	0.907927	0.826555	0.995641
	Oppland	IV	3	144	17.6083	79.0139	1.78056	11.9167	529.625	97.1528	76.5556	12.9424	11.8881	3.02582	1.39845	0.0459143	0.967168	0.918931	0.99705
	Oppland	V	1	135	25.7052	384.733	9.8763	22.9689	693.985	92.5778	72.6667	35.8615	20.1493	5.12849	7.75684	1.48784	0.80819	0.695235	0.993978
	Oppland	V	2	325	23.0397	256.12	5.304	18.5917	698.203	117.932	85.1785	29.1578	14.8148	3.77074	4.16576	0.223637	0.946316	0.886351	0.996667
	Oppland	V	3	407	20.4376	129.145	2.08575	13.9305	586.233	134.143	90.7322	19.309	15.5172	3.94952	1.63815	0.214288	0.869189	0.732385	0.992468
Eriksen, R. Tometer, S. Ludahl, A. Statistikk over skogforhold og -ressurser i Telemark. Landsskogtakseringen 2000-2004. NIJOS-ressursoversikt: 05/06. 2001, pp. 1-52.
Table 68. Summary for cutting class III	Telemark	III	1	79	13.2722	150.19	14.457	13.6089	1622.19	36.4557	34.1519	22.2425	3.84615	0.978942	11.3545	0.00242309	0.999787	0.999251	0.999956
Table 69. Summary for cutting class IV	Telemark	III	2	32	12.4	93.125	8.04375	11.525	1291.75	44.4375	44.125	15.7102	6.45161	1.6421	6.31756	0.00821826	0.998699	0.995863	0.999788
Table 70. Summary for cutting class V	Telemark	III	3	3	12.4	62	4.2	10.5	949	66	68	11.4604	0	0	3.29868	0	1	1	1
Table 79. Volum percentage of decay in cutting classes III-V	Telemark	IV	1	81	20.3457	307.136	18.4852	19.0012	995.926	53.3086	43.5185	32.8921	3.75	0.954468	14.5183	0.00208306	0.999857	0.999498	0.999971
	Telemark	IV	2	53	20.1604	150.642	6.06792	15.8906	632	80.6981	66.1698	20.3161	28.8462	7.34206	4.76575	17.1911	-2.60723	-2.55068	0.96405
	Telemark	IV	3	30	17.9867	83.3333	2.38333	12.51	506.9	97.1	80.4667	12.8918	10.3448	2.63302	1.87187	0.0248512	0.986724	0.96469	0.998584
	Telemark	V	1	26	25.9115	318.846	9.09615	22.4	572.385	95.8462	61.5385	30.3338	8	2.0362	7.14412	0.0151002	0.997886	0.993776	0.999717
	Telemark	V	2	134	22.5604	208.604	5.10821	17.8127	632.41	120.157	78.4776	25.1777	12.782	3.25333	4.01199	0.0962469	0.97601	0.943618	0.998096
	Telemark	V	3	144	20.4458	123.417	2.65	13.8292	556.375	142.917	91.2917	18.3404	11.1888	2.84783	2.08131	0.0427444	0.979463	0.947649	0.998022
Eriksen, R. Tomter, S. Ludahl, A. Statistikk over skogforhold og -ressurser i Vestfold, Landsskogtakseringen 2000-2004. . NIJOS-ressursoversikt: 03/06. 2001, pp. 1-52.
Table 68. Summary for cutting class III	Vestfold	III	1	356	13.8854	153.101	16.4427	13.6506	1505	33.118	29.5449	22.8439	1.69014	0.430183	12.9141	0.000280318	0.999978	0.999918	0.999995
Table 69. Summary for cutting class IV	Vestfold	III	2	64	12.8375	84	7.5375	11.4	1168.5	43.5	40.875	15.0786	1.5873	0.404008	5.91995	0.000172874	0.999971	0.999889	0.999993
Table 70. Summary for cutting class V	Vestfold	IV	1	337	21.5629	285.065	16.6718	19.578	828.561	52.543	43.908	30.3177	9.52381	2.42405	13.094	0.0347161	0.997349	0.992702	0.999696
Table 79. Volum percentage of decay in cutting classes III-V	Vestfold	IV	2	66	21.4727	143.727	6.69091	16.0909	517.545	76.3636	60.9091	18.7438	12.3077	3.13261	5.25504	0.0631662	0.98798	0.971044	0.998988
	Vestfold	IV	3	9	17.1	78	2.8	11.4	588	93	68	13.5039	0	0	2.19912	0	1	1	1
	Vestfold	V	1	116	25.3293	315.276	10.1414	23.1569	519.517	82.7931	60.1379	26.0347	13.913	3.54122	7.96504	0.132514	0.983363	0.96315	0.998854
	Vestfold	V	2	102	22.5196	206.588	6.05882	18.202	587.314	110.843	77.5686	23.5448	6.93069	1.76403	4.7586	0.00831833	0.998252	0.994599	0.999738
	Vestfold	V	3	35	20.3314	136.429	3.74571	14.5314	606.029	126.886	93.3429	19.5362	8.82353	2.24581	2.94188	0.0180692	0.993858	0.982502	0.999234
Tomter, S. Eriksen, R. Statistikk over skogforhold og -ressurser i Østfold - Landsskogtakseringen 1995 – 1999. NIJOS-ressursoversikt: 01/01. 2001, pp. 1-56
Table 70. Summary for cutting class III	Østfold	III	1	258	13.0217	154.376	13.5535	13.4364	1760.54	35.531	30.9806	23.5263	5.05837	1.28748	10.6449	0.00557761	0.999476	0.998241	0.999903
Table 71. Summary for cutting class IV	Østfold	III	2	51	11.6922	90.9804	5.99608	11.2431	1419.8	46.2549	42.2941	15.21	4	1.0181	4.70932	0.00210169	0.999554	0.998437	0.999909
Table 72. Summary for cutting class V	Østfold	IV	1	317	20.1237	280.517	11.1678	19.3483	948.155	57.2871	49.0315	30.2509	10.1266	2.57747	8.77121	0.0472746	0.99461	0.985569	0.99942
Table 82. Volum percentage of decay in cutting classes III-V	Østfold	IV	2	203	18.7872	200.074	6.2133	16.068	880.507	77.1921	65.5468	24.4742	9.40594	2.39405	4.87993	0.030832	0.993682	0.982476	0.99926
	Østfold	IV	3	24	17.7	101	2.4	13.4	546	92	84	13.4347	0	0	1.88496	0	1	1	1
	Østfold	V	1	306	25.6301	440.199	9.89641	23.8327	743.941	86.0882	69.5719	38.584	10.8197	2.75388	7.77264	0.0613968	0.992101	0.979587	0.99922
	Østfold	V	2	190	22.6842	268.789	5.13158	18.8632	724.316	111.211	86.3158	29.1573	10.582	2.69339	4.03034	0.0485394	0.987957	0.968468	0.998771
	Østfold	V	3	45	19.3	145	2.5	14.6	675	130	96	19.7473	4.54545	1.15693	1.9635	0.00229601	0.998831	0.996016	0.999778
[truncated: 9 more columns]
